# Supplementary material for: α-amino trimethylation of CENP-A by NRMT is required for full recruitment of the centromere
Source: PubMed Central journal article supplement (PMC5343448; doi:10.1038/ncomms14678), 2017-03-07
Supplement: ncomms14678-s1.pdf [file ncomms14678-s1.pdf]

Supplementary Fig. 1

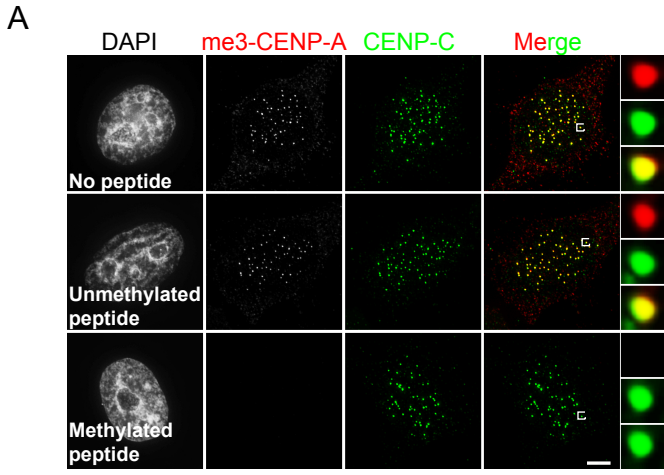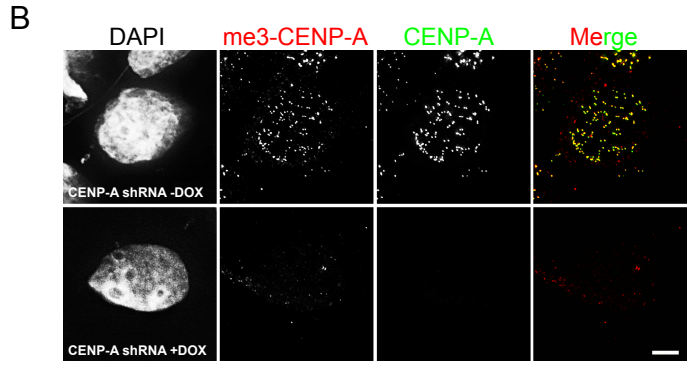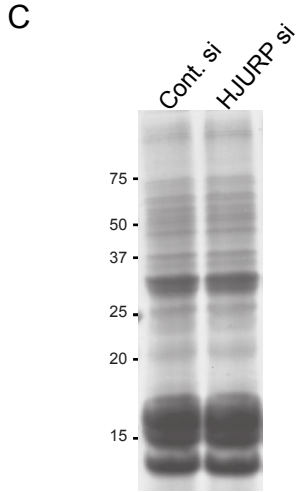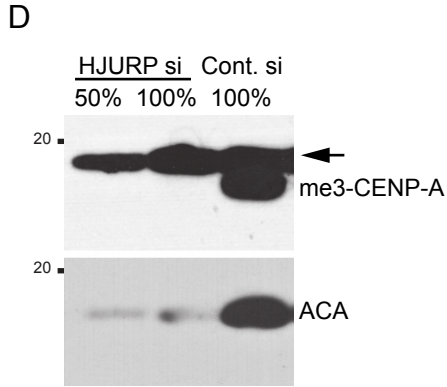

**Supplementary Figure 1. Anti-me3-CENP-A antibody specifically detects methylated CENP-A at the centromere** (A) Peptide blocking experiment showing anti me3-CENP-A antibody specifically blocked by methylated peptides. (B) CENP-A knockdown followed by Immunofluorescence analysis in HEK cells using me3-CENP-A antibody showing complete lack of centromere staining. (C) Acid extracted histones after siRNA mediated HJURP knockdown. (D) me3-CENP-A antibody detects CENP-A in the control but not in the HJURP knockdown samples. Arrow indicates non-specific band. Scale bar, 10  $\mu$ m.

Supplementary Fig.2

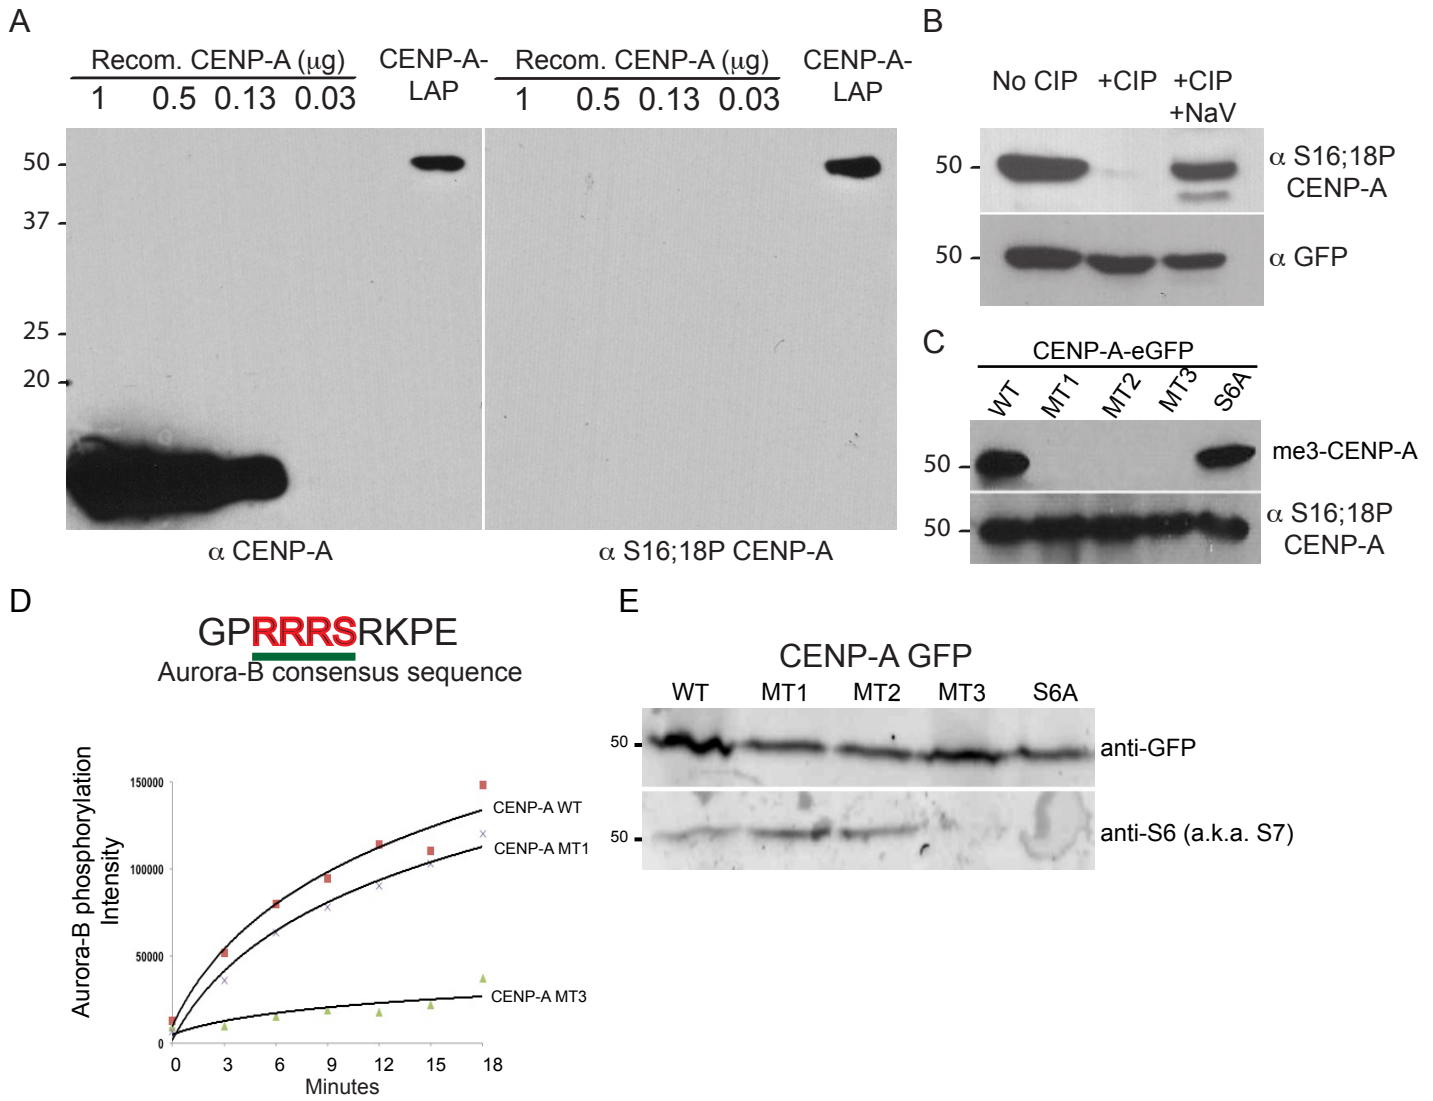

**Supplementary Figure 2. Phosphorylation status of CENP-A amino tail in CENP-A methylation mutants** (A) Specificity of CENP-A S16;18 phospho antibody. The western blot analysis of purified CENP-A shows that the antibody did not detect purified CENP-A but CENP-A-eGFP in the cell lysate. (B) Treatment of the lysate with phosphatase abolished the detection of the CENP-A by the antibody and is rescued by treating phosphatase along with sodium vanadate. (C) Western blot showing methylation mutants MT1, 2 and 3 phosphorylated at S16:18. (D) Aurora B kinase assay showing MT3 is not phosphorylated. CENP-A Aurora B consensus sequence is shown. (E) CENP-A wild type and mutants were analyzed by western blotting for S6 phosphorylation and similar to kinase assay, MT3 was not phosphorylated.

Supplementary Fig.3

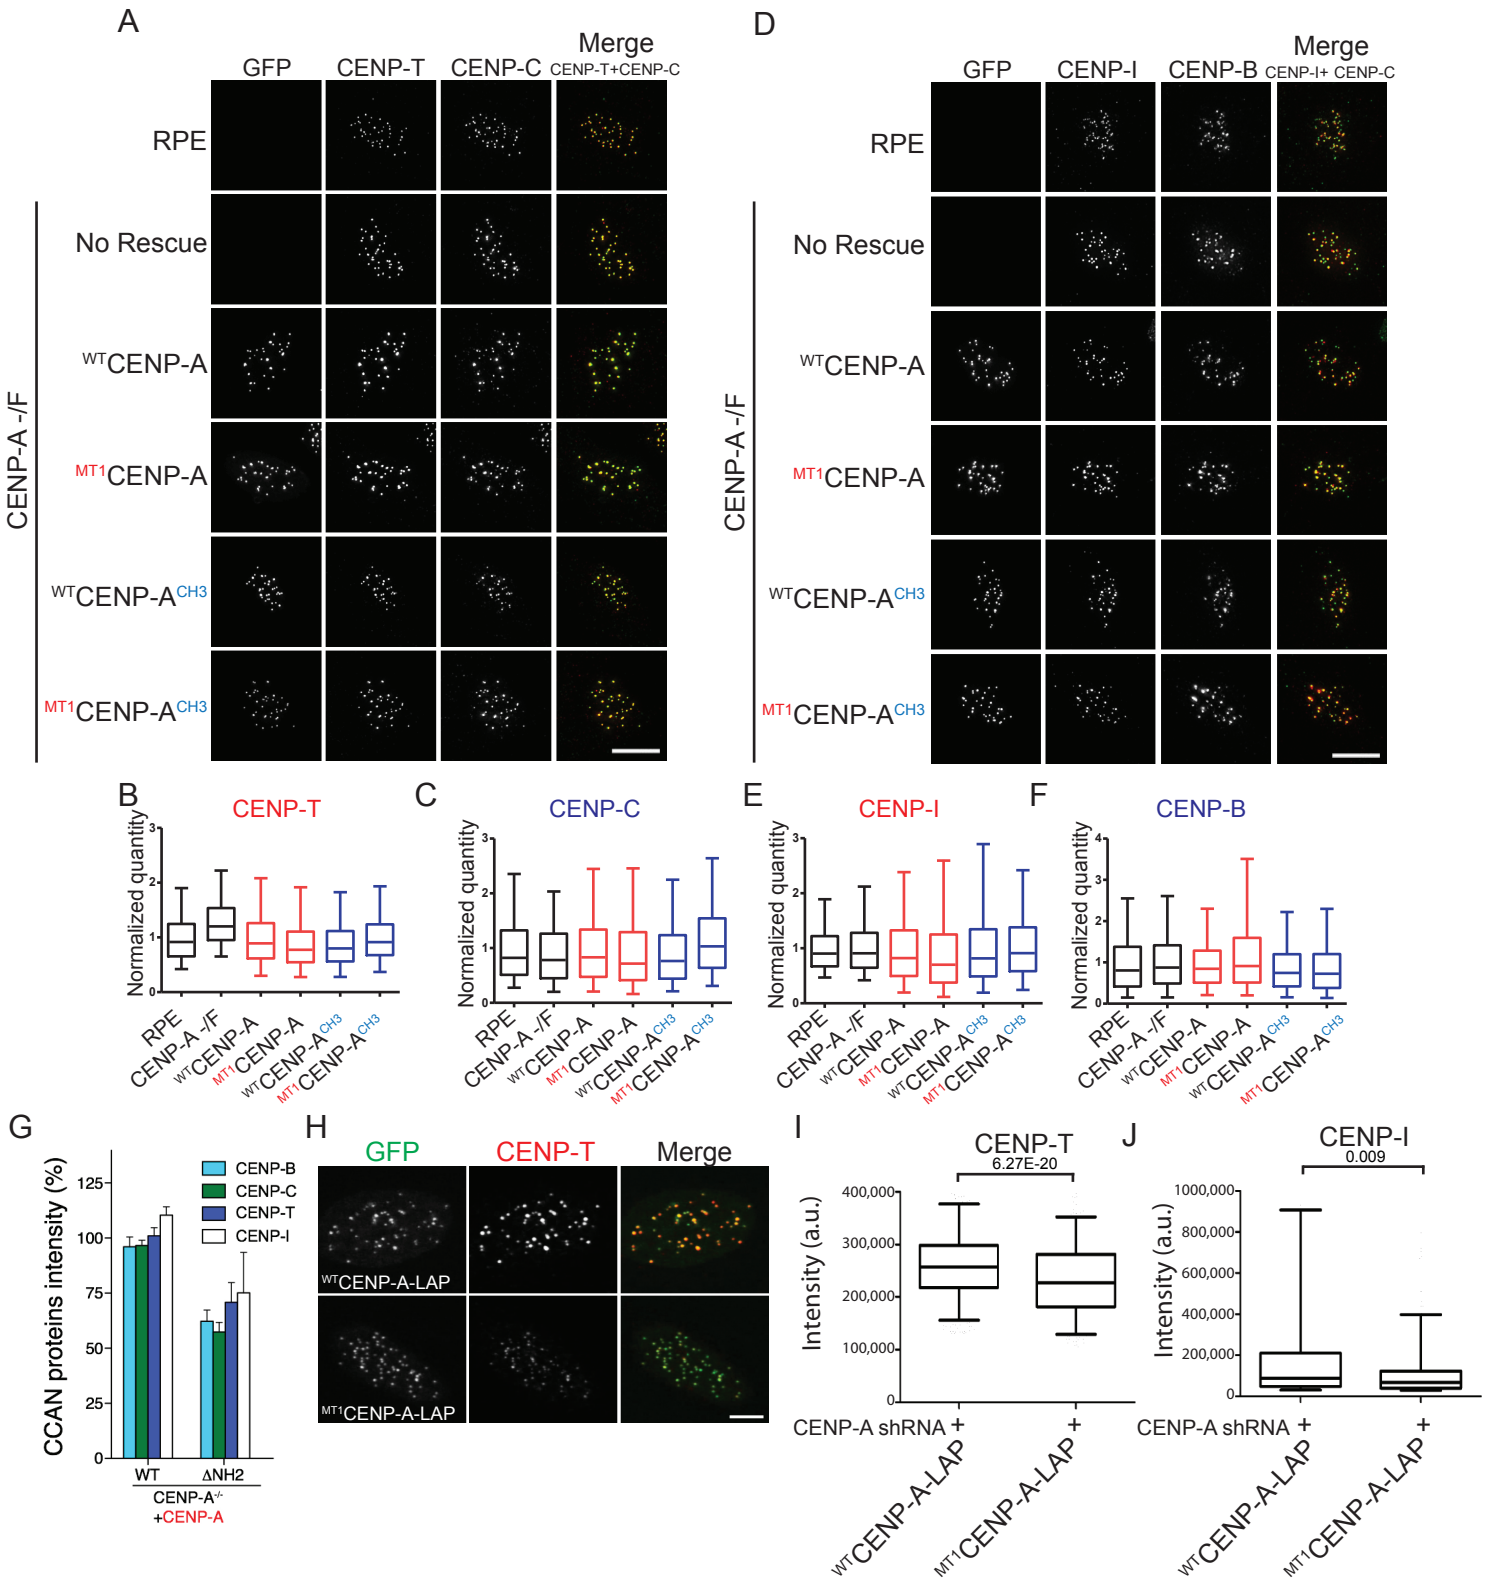

**Supplementary Figure 3. CCAN components did not change drastically in cells expressing wild type or mutant exogenous CENP-A in the presence of endogenous CENP-A** (A) Representative images of the cells stained for CENP-T and CENP-C. (B&C) Quantitation of CENP-T and CENP-C respectively at the centromere in cells expressing endogenous CENP-A. (D) Representative images of the cells stained for CENP-I and CENP-B. (E&F) Quantitation of CENP-I and CENP-B respectively at the centromere. More than 30 cells in two biological replicates used for the quantitation. Box-and-whisker plots. Central lines, medians; whiskers, range 5-95 percentile; outliers not shown, Scale bar, 10  $\mu\text{m}$ . (G) Localization of CENP-T, CENP-I, CENP-C and CENP-B at the centromere after replaced with CENP-A N-terminal tail deletion mutant. Error bars indicate standard deviation. (H) CENP-T localization to the centromere reduced in HeLa-TRex cells replaced with mutant CENP-A. The endogenous CENP-A is suppressed by CENP-A 3'UTR shRNA. (I&J) Quantitation of the CENP-T and CENP-I level after knockdown and replacement of the endogenous CENP-A using Velocity 5.5. Box-and-whisker plots. Central lines, medians; whiskers, range 5-95 percentile; outliers not shown. p-values determined by t-test.

Supplementary Fig.4

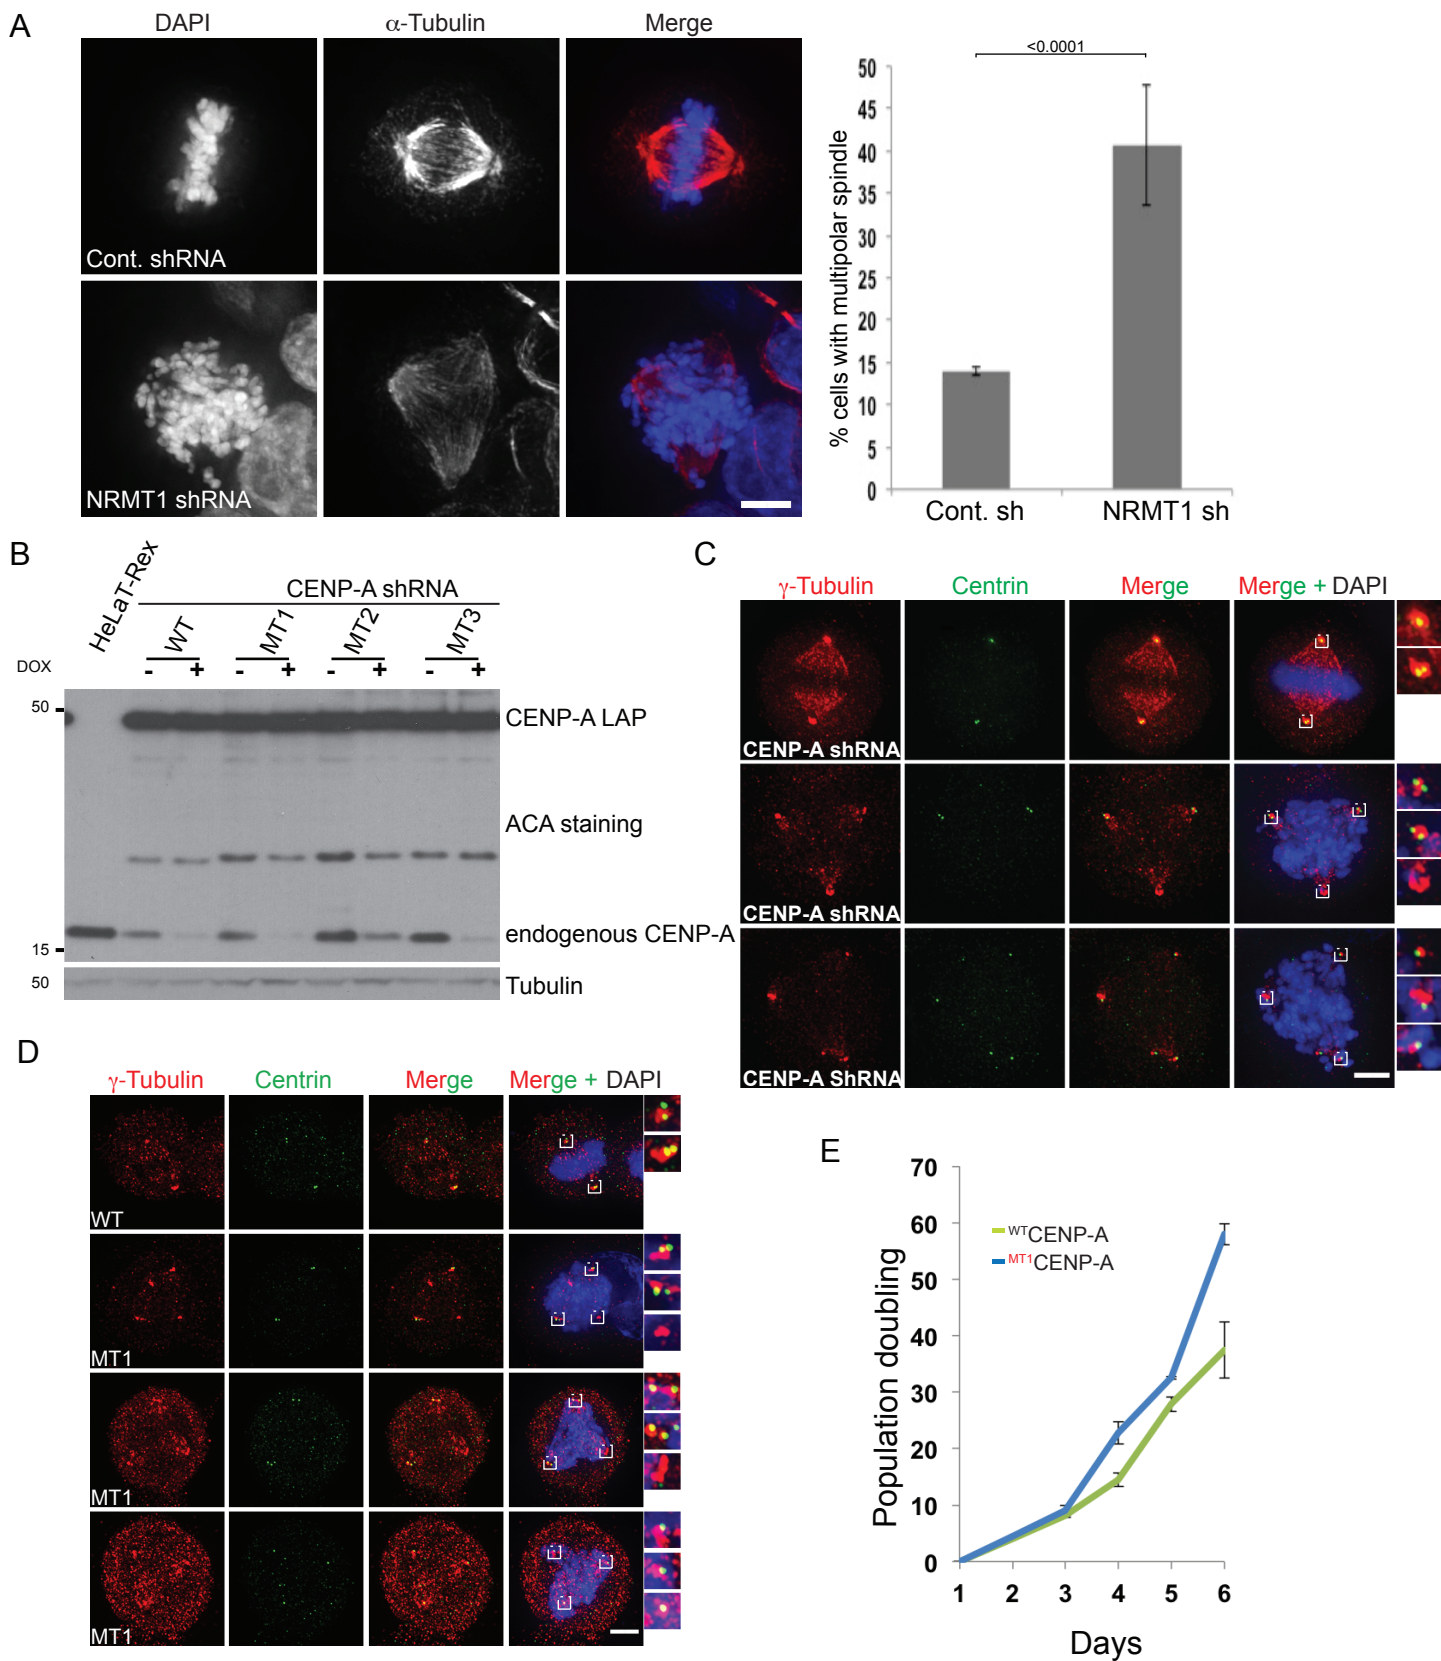

**Supplementary Figure 4. NRMT1 knockdown and CENP-A methylation mutant result in the same phenotype** (A) NRMT1 knockdown causes multipolar phenotype. Control vs NRMT1 shRNA given in the graph. Mean and standard deviation shown from three different experiments.  $\chi^2$  test was used. (B) Endogenous CENP-A knockdown efficiency in CENP-A knockdown replacement experiments. (C) Multipolarity caused by centriole disengagement and/or pericentriolar matrix splitting in CENP-A knockdown experiments and knockdown and replacement experiments. (D) Images of different types of centrosomes with or without centrioles seen after CENP-A knockdown are shown. Scale bar, 10  $\mu\text{m}$ . (E) The population doubling of the HCT116 p53<sup>-/-</sup> cells replaced with <sup>WT</sup>CENP-A or <sup>MT1</sup>CENP-A. Endogenous CENP-A was knockdown using 3'UTR shRNA. Experiment was conducted in triplicate. Error bars indicate standard deviation.



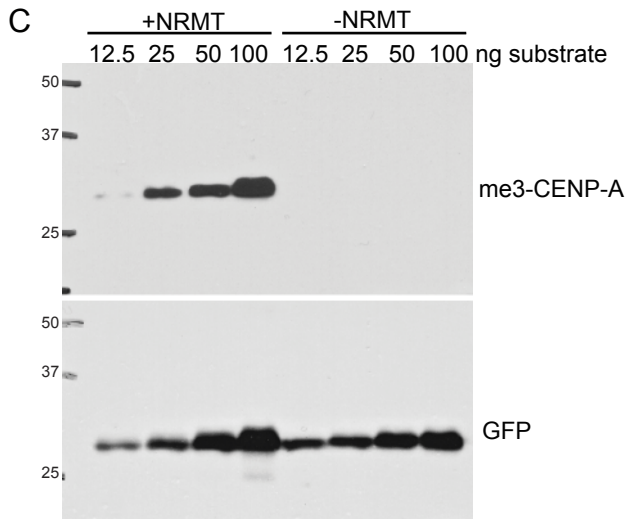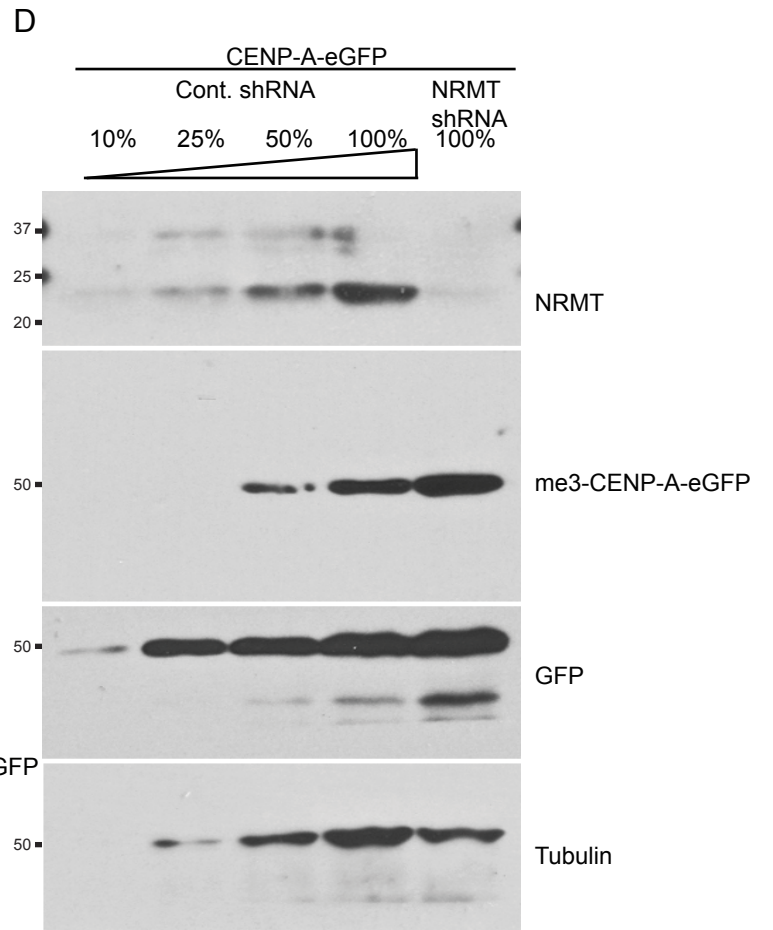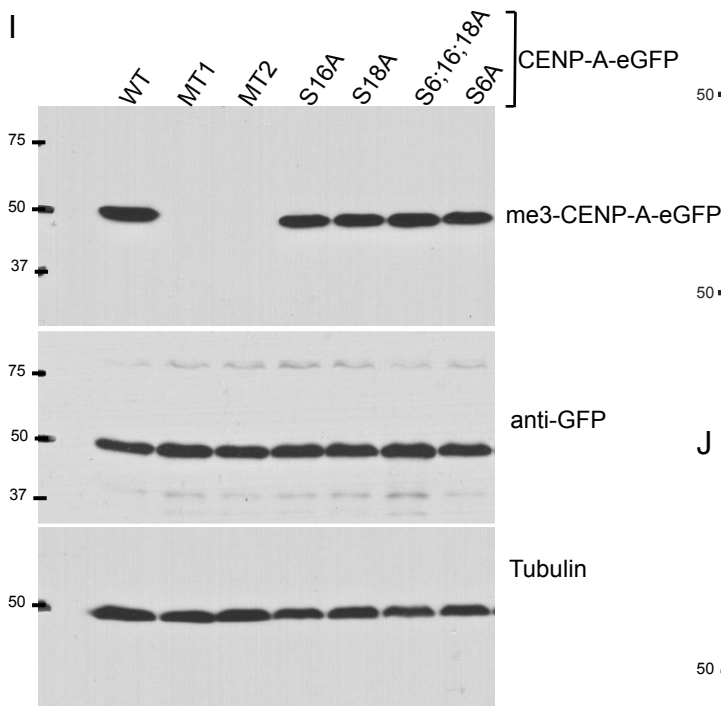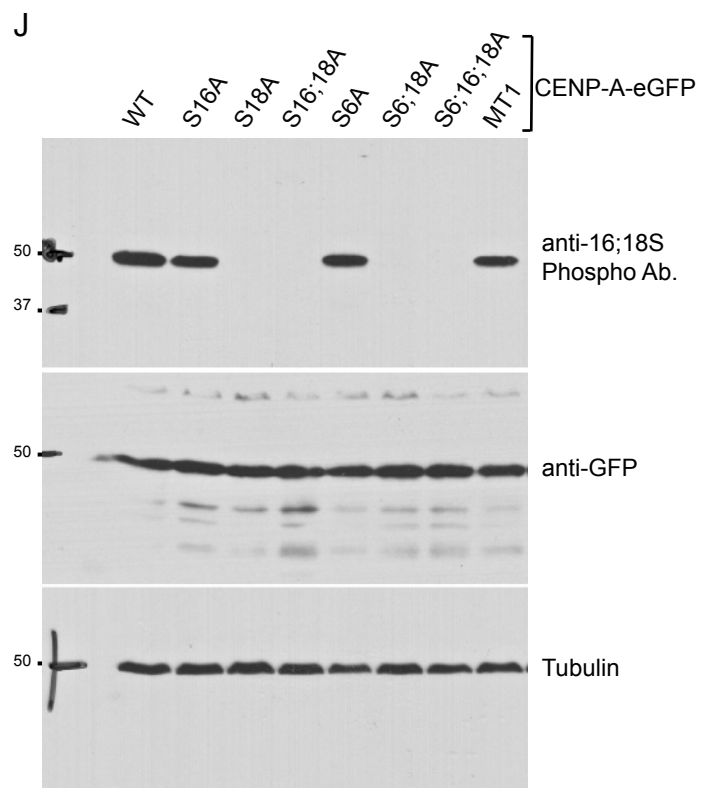

Supplementary Figure 5. Uncropped blots from figure 1.

Figure 4 D

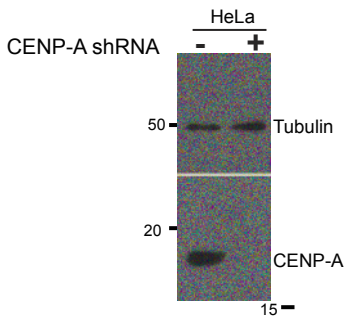

Figure 5 B

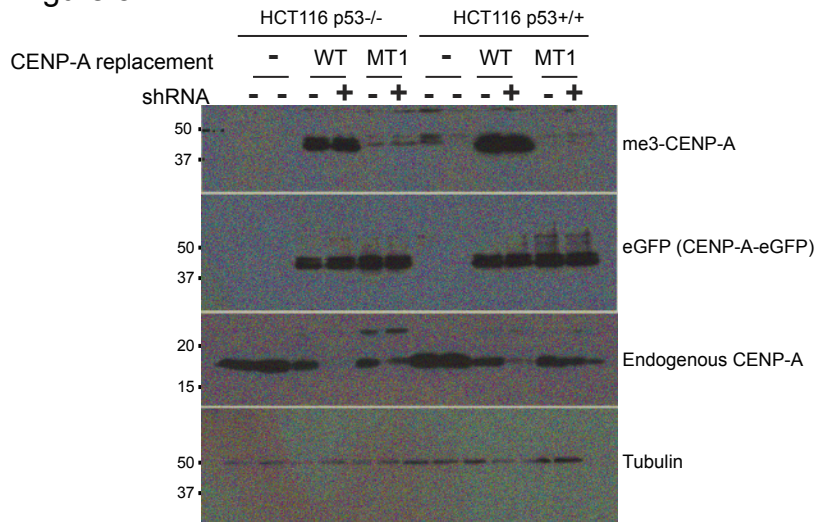

Figure 6 B

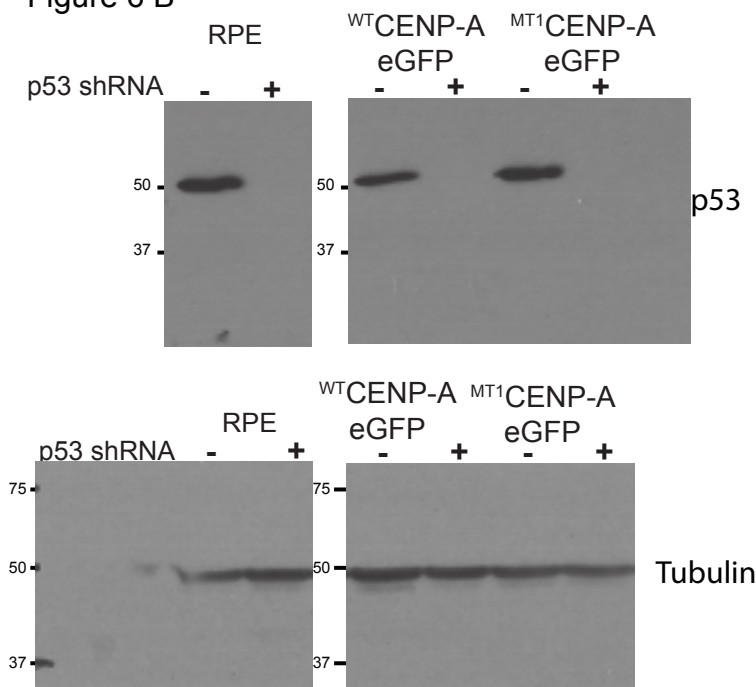

Figure 6 E

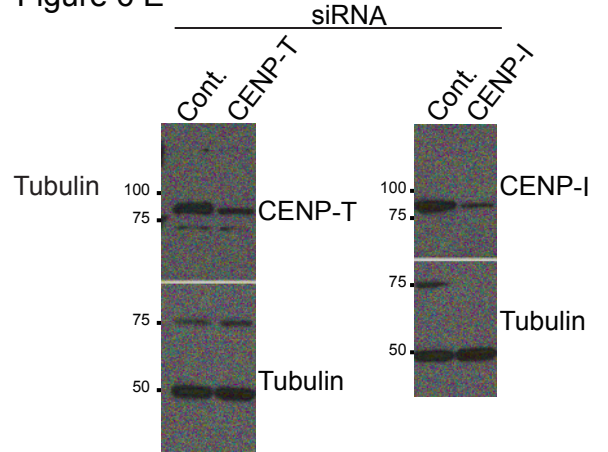

Supplementary Figure 6. Uncropped blots from figures 4, 5 and 6 as indicated.

## Supplementary Methods

**Acid extraction of histones:** The histones were acid extracted from  $2 \times 10^7$  HeLa cells after HJURP or control siRNA knocked down for 72 hours<sup>1,2</sup>. Briefly, the cells were treated with hypotonic buffer for 30 minutes on a rotator. Pelleted the nuclei and added 400 $\mu$ l of 0.4N H<sub>2</sub>SO<sub>4</sub>. Histones were extracted for 30 minutes and then TCA precipitated from the supernatant.

**Peptide blocking:** The diluted anti-me3 CEMP-A antibody pre-incubated with 10 times peptides (methylated or un-methylated peptides) for 30 minutes. The antibody then centrifuged at 12,000xg for 5 minutes and used for immunofluorescence as described before.

## Supplementary References

1. Shechter, D., Dormann, H.L., Allis, C.D. & Hake, S.B. Extraction, purification and analysis of histones. *Nature protocols* **2**, 1445-1457 (2007).
2. Foltz, D.R. *et al.* Centromere-specific assembly of CENP-a nucleosomes is mediated by HJURP. *Cell* **137**, 472-484 (2009).
